# Supplementary material for: GR13-type plasmids in Acinetobacter potentiate the accumulation and horizontal transfer of diverse accessory genes
Source: PubMed Central journal article supplement (PMC9455709; doi:10.1099/mgen.0.000840), 2022-06-22
Supplement: mgen-8-840-s001.pdf [file mgen-8-840-s001.pdf]

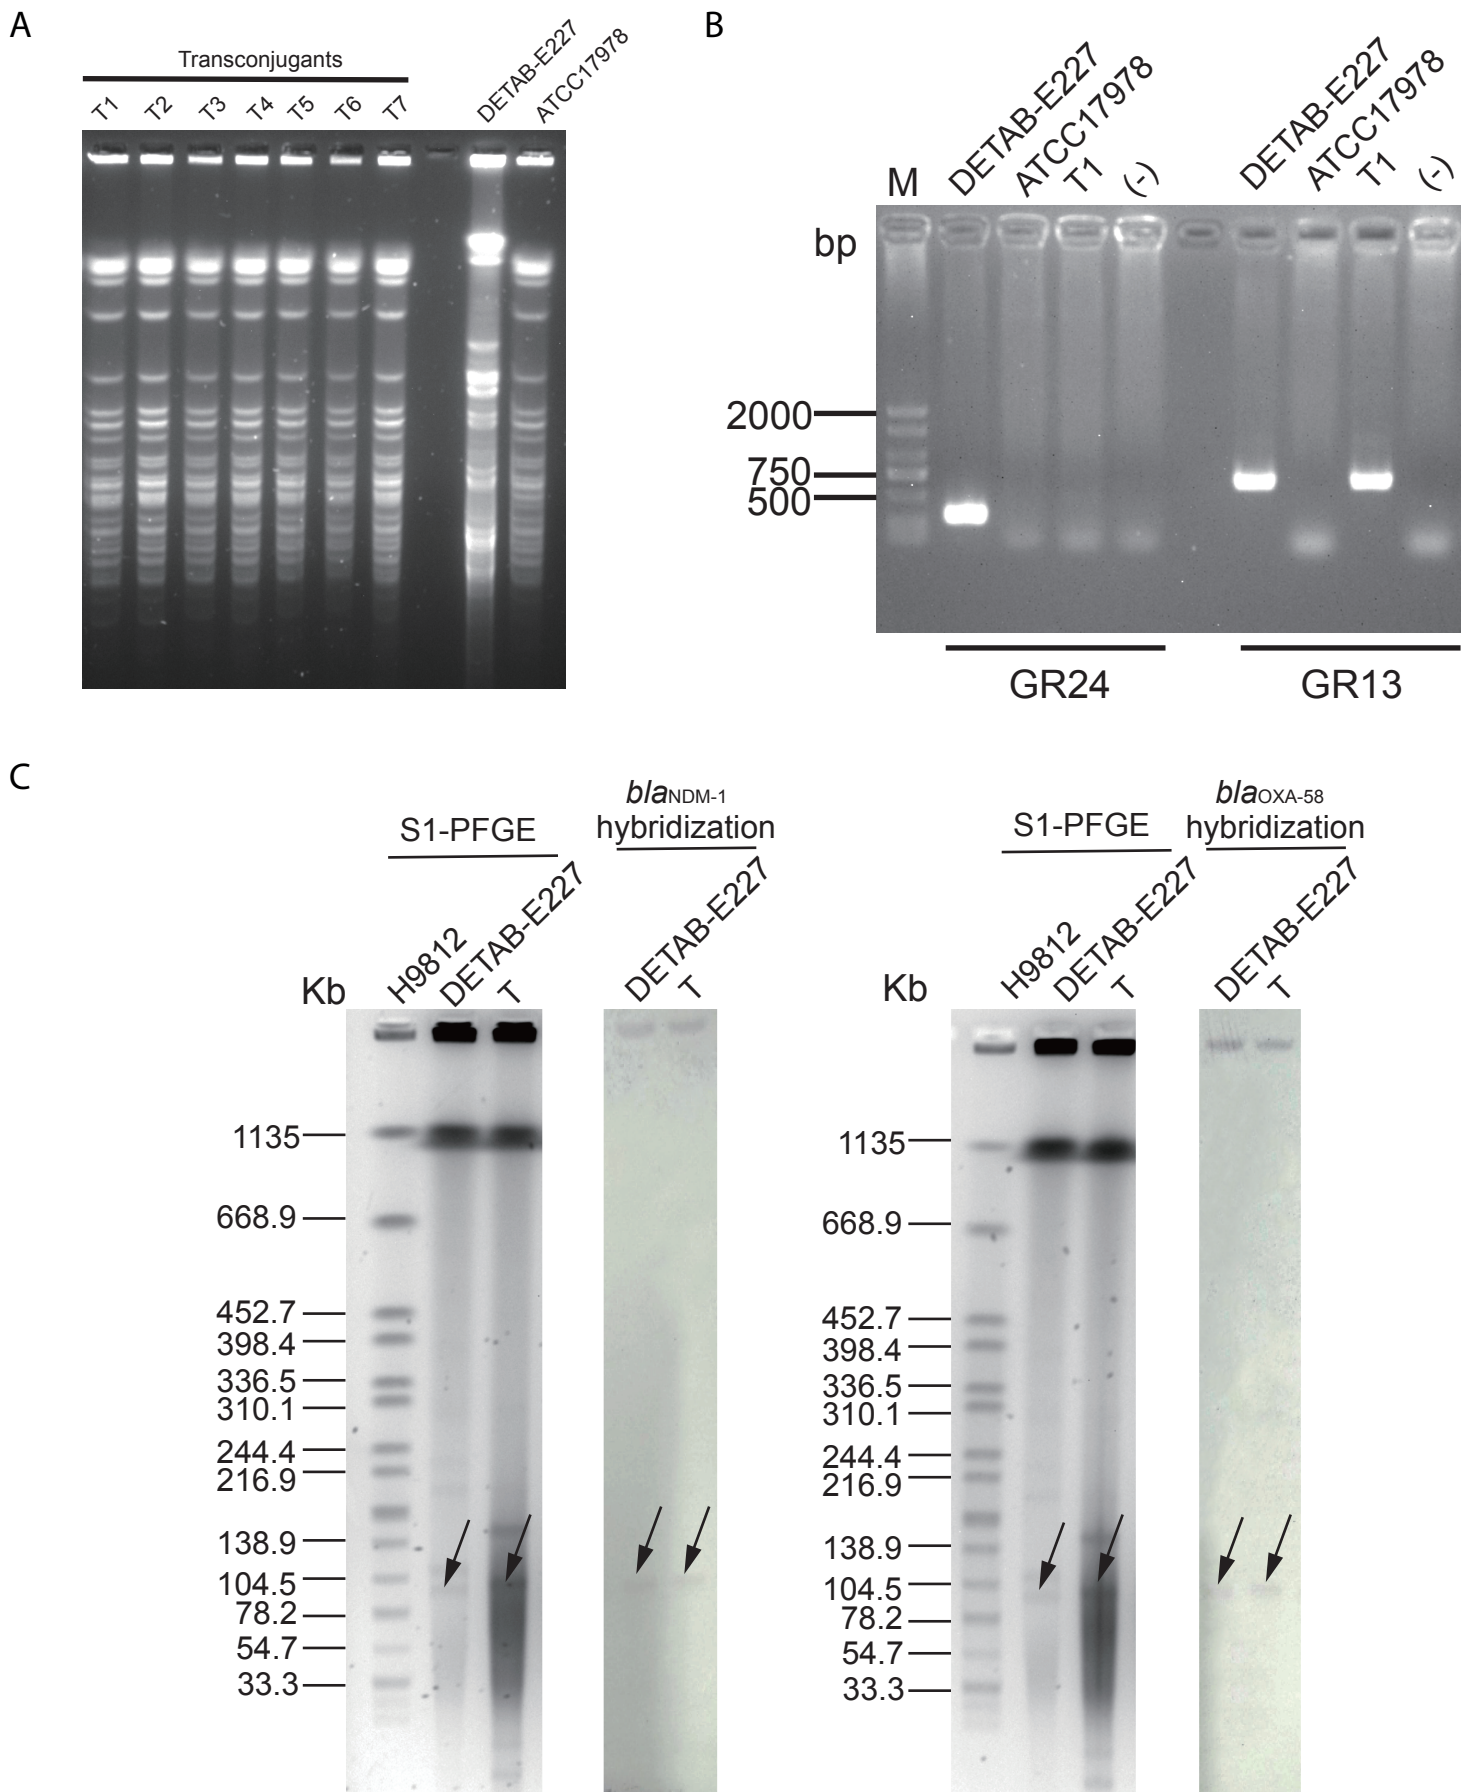

**Figure S1:** Transfer of pDETAB5. A) Apal-treated genomic DNA from DETAB-E227, ATCC 17978 and putative ATCC 17978 transconjugants after pulsed-field gel electrophoresis. (PFGE) B) Agarose gel showing the products of PCRs targeting the rep genes of pDETAB4 (GR24) and pDETAB5 (GR13). The source of template DNA for each reaction is labelled above, with (-) indicative of a no-DNA control. The sizes in base pairs of labelled DNA size marker bands are indicated to the left. C) S1-treated DNA after PFGE and hybridisation with *bla*<sub>NDM-1</sub> and *bla*<sub>OXA-58</sub>-specific probes. The sizes of bands in the DNA size marker (in kilobase pairs) are indicated to the left.

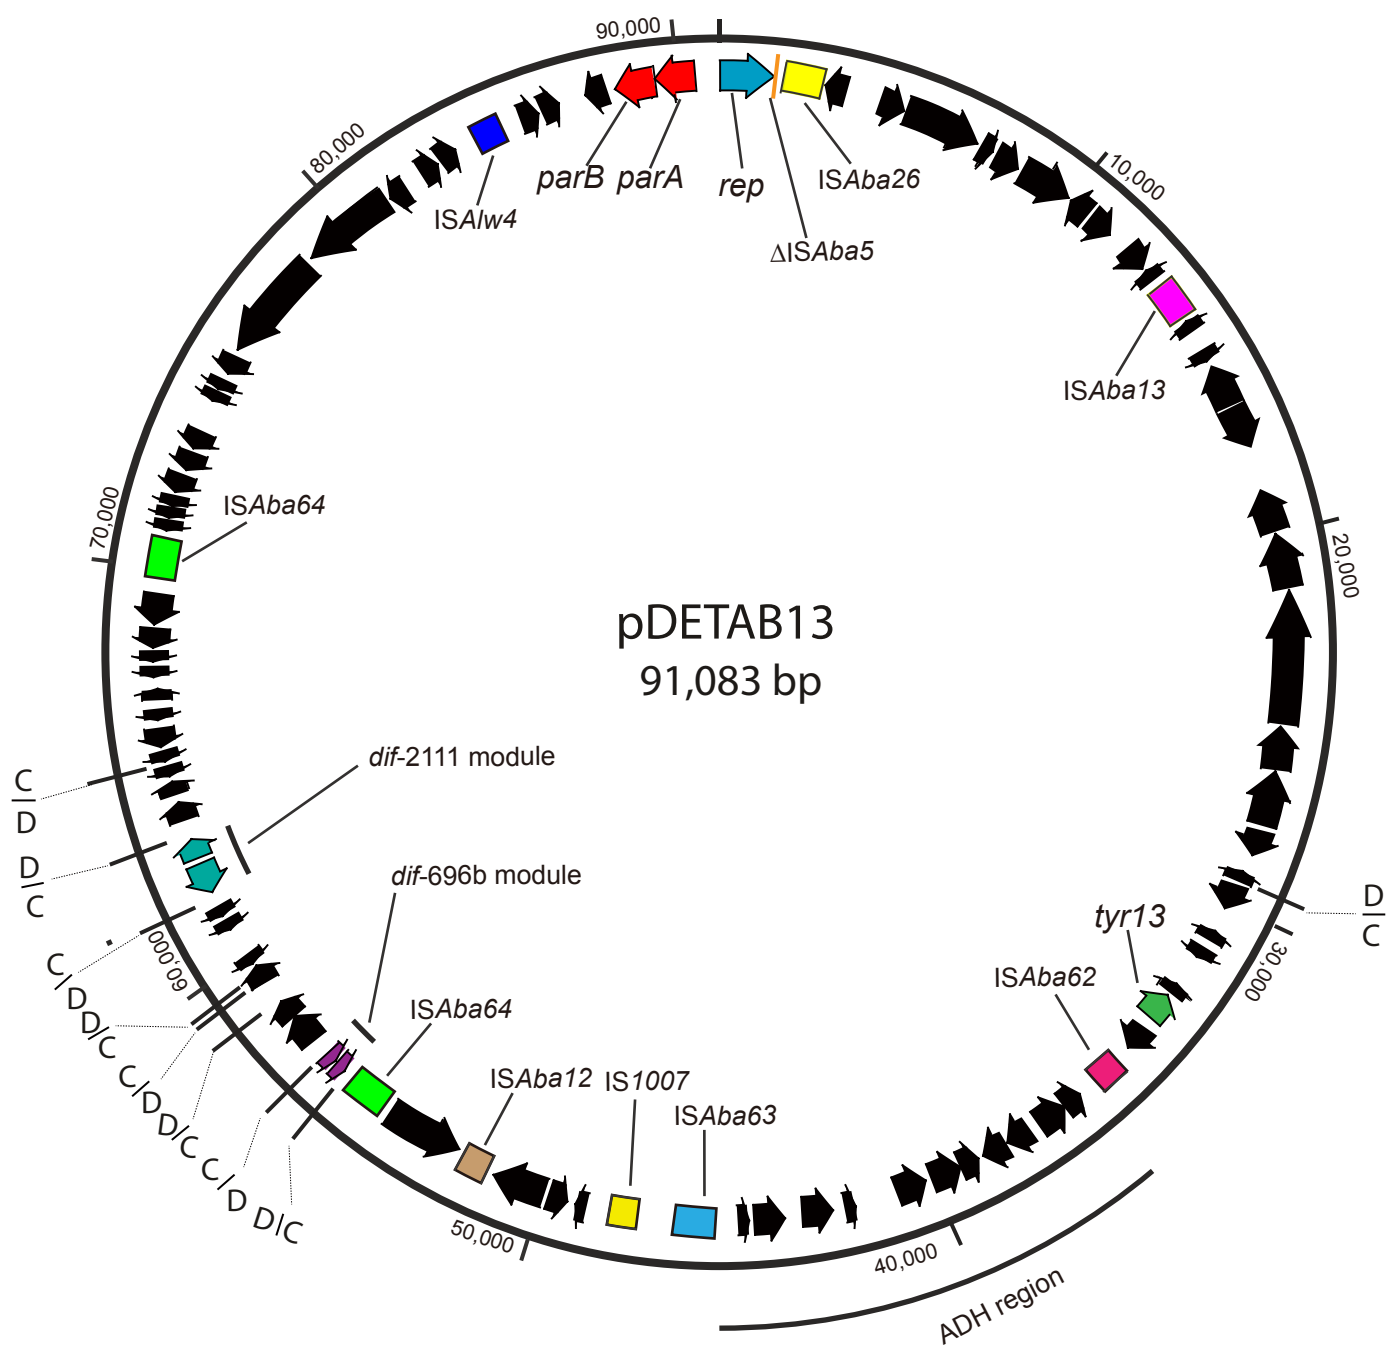

**Figure S2:** Circular map of pDETAB13. Plasmid sequence is shown as a black line, with arrows inside representing ORFs. Coloured boxes represent IS. Black lines marked "C/D" or "D/C" represent *pdif* sites and indicate their orientations. Drawn to scale from GenBank accession CP073061.

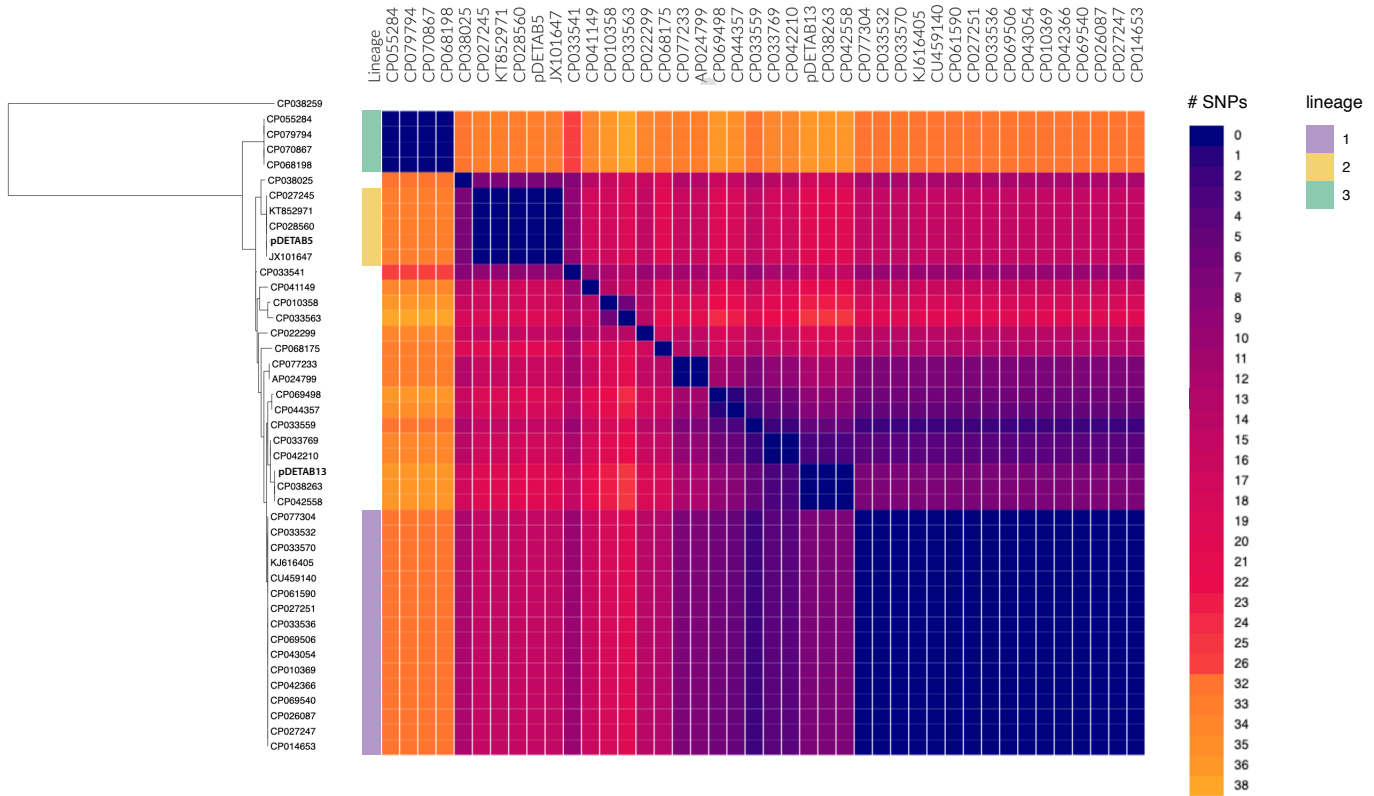

**Figure S3:** GR13 *rep* gene SNP matrix. The numbers of SNPs between *rep* genes and plasmid lineage memberships are indicated by shading as outlined in the legends to the right of the grid.

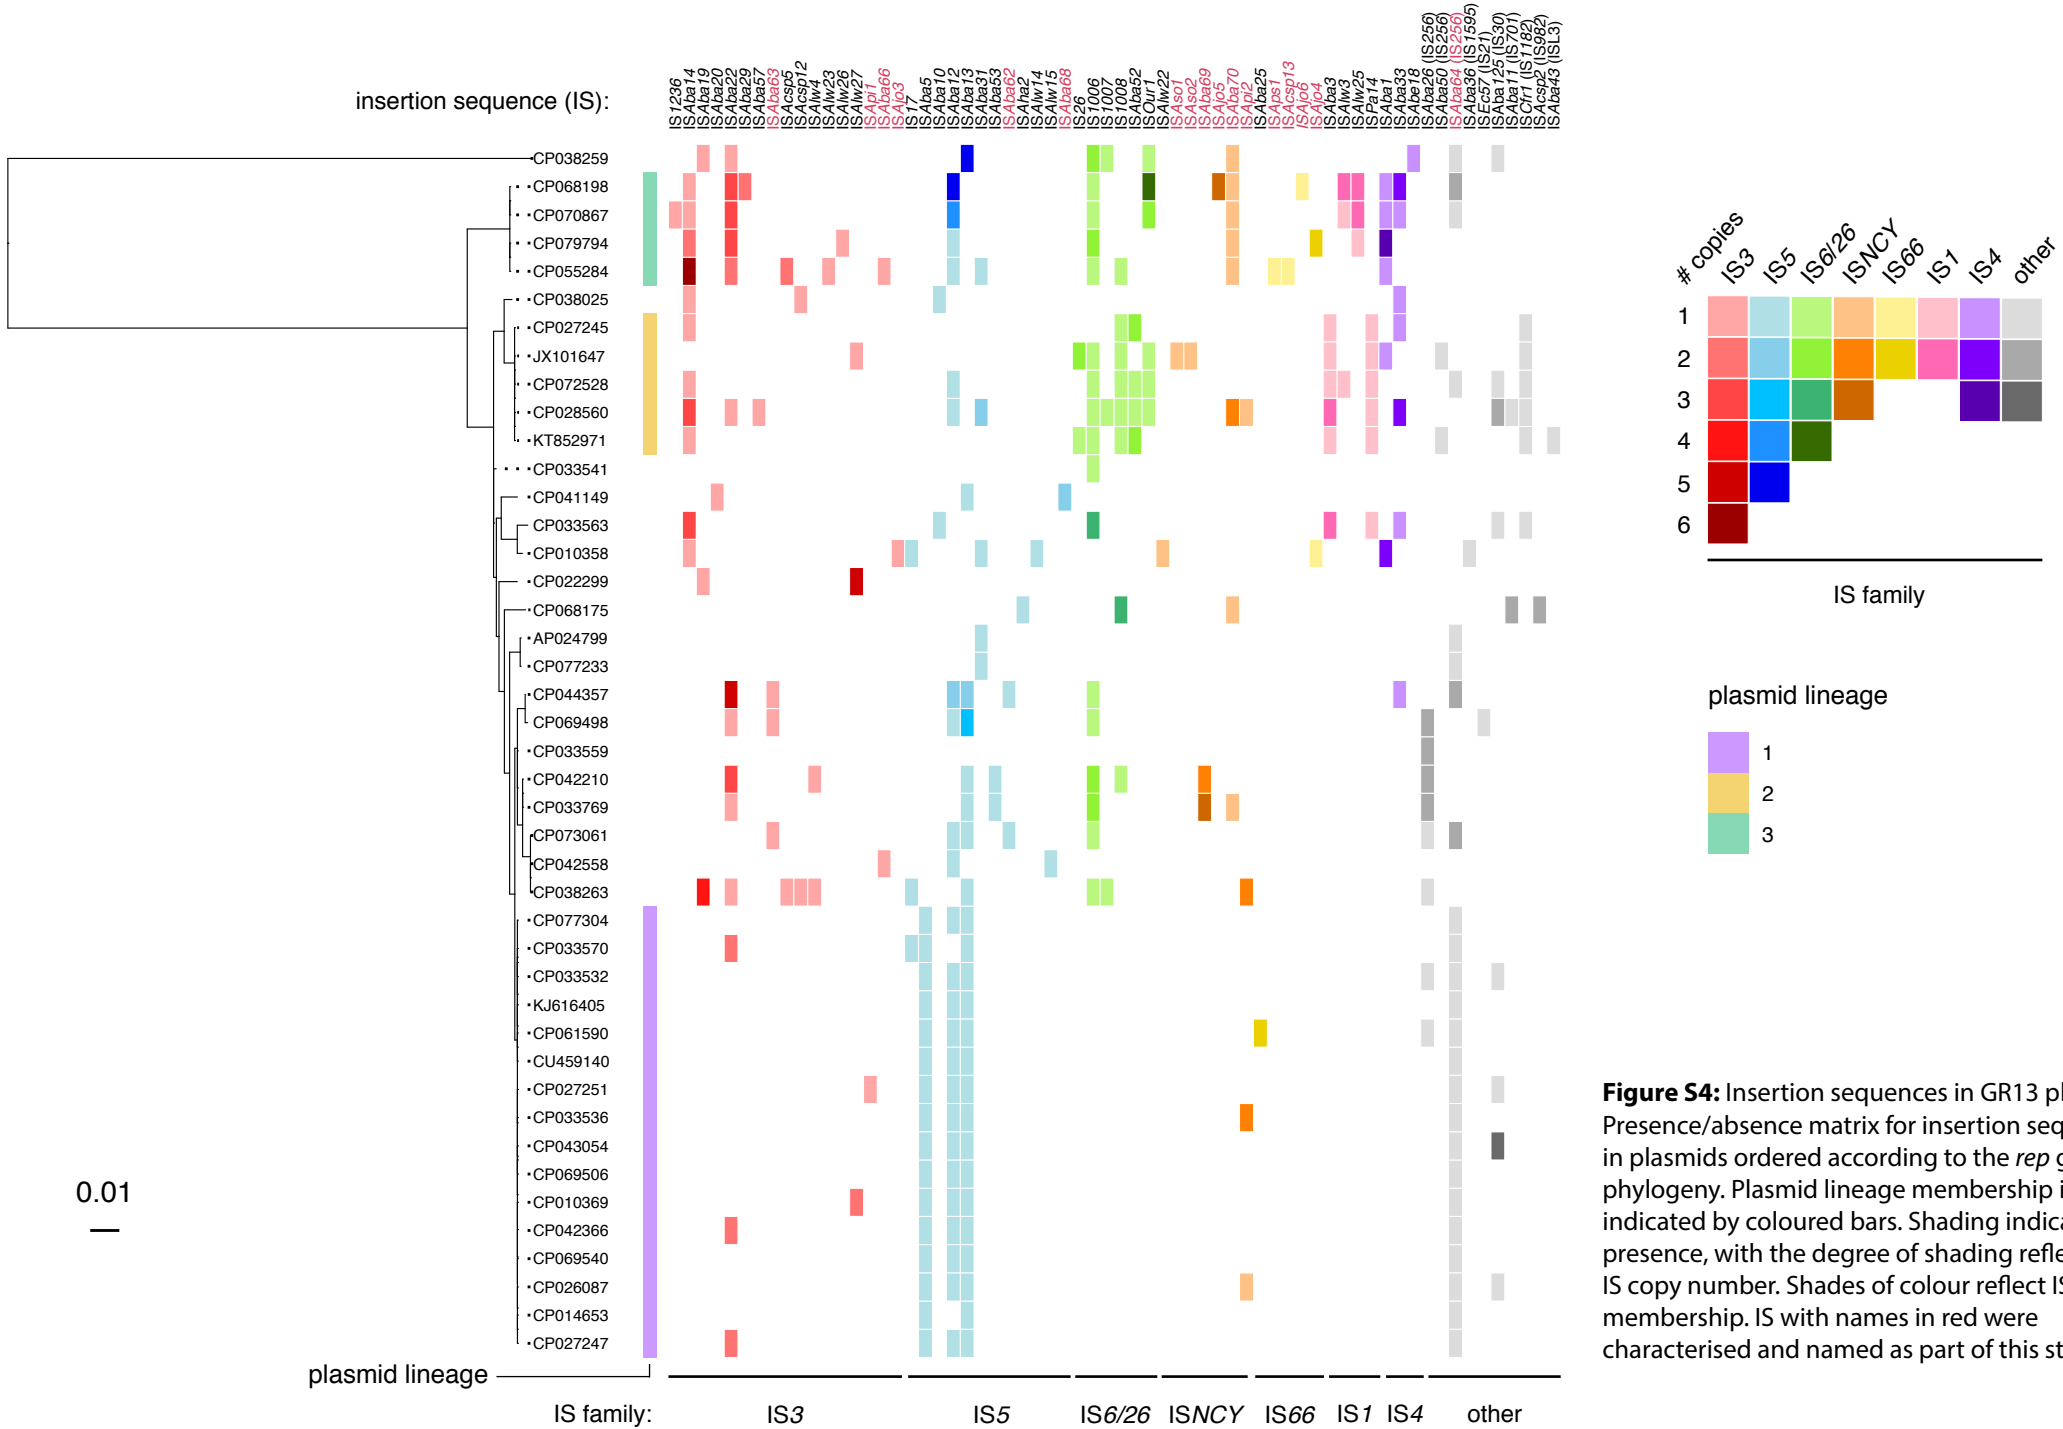

**Figure S4:** Insertion sequences in GR13 plasmids. Presence/absence matrix for insertion sequences in plasmids ordered according to the *rep* gene phylogeny. Plasmid lineage membership is indicated by coloured bars. Shading indicates IS presence, with the degree of shading reflective of IS copy number. Shades of colour reflect IS family membership. IS with names in red were characterised and named as part of this study.



**Table S1:** Primers used to detect DETAB-E227 plasmid replicons via PCR

| Replicon type | Plasmid | Primer name | Primer sequence (5'-3')  | Expected product size (bp) |
|---------------|---------|-------------|--------------------------|----------------------------|
| GR24          | pDETAB4 | Hgz_103-F   | TGGCAAGATTGAGGTGGTTC     | 327                        |
|               |         | Hgz_103-R   | AAGTTGGTCATATCCGTACTTTCG |                            |
| GR13          | pDETAB5 | GR13-F      | TAGTAACCGTCTGATTAGAC     | 680                        |
|               |         | GR13-R      | GACCTTCTTGATGGTATCG      |                            |

All primers were used in PCRs with annealing temperatures of 55°C.

**Table S2:** Novel IS found in the GR13 plasmid collection

| IS       | Closest match (family) | % ID | Plasmid  |
|----------|------------------------|------|----------|
| ISAcsp13 | ISAb49 (IS66)          | 93.7 | CP055284 |
| ISAb62   | ISAb12 (IS5)           | 92.6 | pDETAB13 |
| ISAb63   | ISAlw4 (IS3)           | 94.5 | pDETAB13 |
| ISAb64   | ISAb26 (IS256)         | 86.2 | pDETAB13 |
| ISAb66   | ISAb29 (IS3)           | 86.7 | CP042558 |
| ISAb67   | ISAcra1 (IS1595)       | 88.0 | CP042558 |
| ISAb68   | ISAh1 (IS5)            | 92.3 | CP041149 |
| ISAb69   | ISAlw22 (ISNCY)        | 91.0 | CP033769 |
| ISAb70   | ISAj2 (ISNCY)          | 92.3 | CP038259 |
| ISAj3    | ISAc1 (IS3)            | 90.8 | CP010358 |
| ISAj4    | ISAlw16 (IS66)         | 94.2 | CP079794 |
| ISAj5    | ISAb32 (ISNCY)         | 92.8 | CP068198 |
| ISAj6    | ISAb46 (IS66)          | 93.8 | CP068198 |
| ISApi1   | ISAcsp3 (IS3)          | 94.2 | CP027251 |
| ISApi2   | ISAj2 (ISNCY)          | 89.7 | CP033536 |
| ISAp1    | ISAb17 (IS66)          | 88.9 | CP055284 |
| ISAs2    | ISAj2 (ISNCY)          | 93.5 | JX101647 |
| ISAs1    | ISAlw22 (ISNCY)        | 89.3 | JX101647 |

**Table S3: Antibiotic minimum inhibitory concentrations**

| Isolates                            | Antibiotic <sup>1</sup> minimum inhibitory concentration (mg/L) <sup>2</sup> |             |             |             |            |              |              |            |             |
|-------------------------------------|------------------------------------------------------------------------------|-------------|-------------|-------------|------------|--------------|--------------|------------|-------------|
|                                     | IMP                                                                          | MEM         | CAZ         | GEN         | TOB        | LEV          | CIP          | COL        | TGC         |
| DETAB-P39                           | 0.125<br>(S)                                                                 | 0.5<br>(S)  | 4<br>(S)    | 0.5<br>(S)  | 1<br>(S)   | 0.06<br>(S)  | 0.125<br>(S) | 1<br>(S)   | 0.25<br>(S) |
| DETAB-E227                          | 256<br>(R)                                                                   | 128<br>(R)  | >256<br>(R) | 256<br>(R)  | 16<br>(R)  | 4<br>(I)     | 4<br>(R)     | 1<br>(S)   | 0.5<br>(S)  |
| ATCC17978                           | 0.5<br>(S)                                                                   | 0.25<br>(S) | 4<br>(S)    | 0.5<br>(S)  | 0.5<br>(S) | 0.125<br>(S) | 0.125<br>(S) | 0.5<br>(S) | 0.5<br>(S)  |
| ATCC17978<br>(pDETAB5) <sup>3</sup> | 256<br>(R)                                                                   | 256<br>(R)  | >256<br>(R) | >256<br>(R) | 8<br>(I)   | 0.125<br>(S) | 0.125<br>(S) | 0.5<br>(S) | 0.25<br>(S) |

<sup>1</sup> IMP = imipenem, MEM = meropenem, CAZ = ceftazidime, GEN = gentamicin, TOB = tobramycin, LEV = levofloxacin, CIP = ciprofloxacin, COL = colistin, TGC = tigecycline

<sup>2</sup> minimum inhibitory concentrations classed as resistant (R), intermediate (I) or sensitive (S)

<sup>3</sup> transconjugant derived from mating DETAB-E227 with ATCC 17978

**Table S4:** Transfer frequency of pDETAB5 from DETAB-E227 to ATCC 17978

|                              | Experiment            |                       |                       | Mean                  |
|------------------------------|-----------------------|-----------------------|-----------------------|-----------------------|
|                              | 1                     | 2                     | 3                     |                       |
| #Donors (D)                  | $1.90 \times 10^9$    | $1.80 \times 10^9$    | $4.2 \times 10^9$     |                       |
| #Transconjugants (TC)        | $1.75 \times 10^3$    | $1.65 \times 10^3$    | $1.05 \times 10^3$    |                       |
| Conjugation frequency (TC/D) | $9.21 \times 10^{-7}$ | $9.17 \times 10^{-7}$ | $2.50 \times 10^{-7}$ | $6.96 \times 10^{-7}$ |

**Table S5: GR13 plasmids in GenBank (last search August 9, 2021)**

| Plasmid        | Accession | Host                     | Country         | Year  | Source                           | Size    | L | +GR | antibiotic resistance genes                                                                                                                                                                     |
|----------------|-----------|--------------------------|-----------------|-------|----------------------------------|---------|---|-----|-------------------------------------------------------------------------------------------------------------------------------------------------------------------------------------------------|
| p3ABAYE        | CU459140  | <i>A. baumannii</i>      | France          | 2001  | human clinical                   | 94,413  | 1 | -   | -                                                                                                                                                                                               |
| pMS32-1        | KJ616405  | <i>A. pittii</i>         | China; Taiwan   | -     | -                                | 94,418  | 1 | -   | -                                                                                                                                                                                               |
| p6411-89.111kb | CP010369  | <i>A. nosocomialis</i>   | Colombia        | 2012  | -                                | 89,111  | 1 | -   | -                                                                                                                                                                                               |
| unnamed2       | CP014653  | <i>Acinetobacter</i> sp. | China; Panjin   | 2015  | marine sediment                  | 50,047  | 1 | -   | -                                                                                                                                                                                               |
| p2012N21-164-1 | CP033536  | <i>A. pittii</i>         | China; Taiwan   | 2012  | human                            | 97,329  | 1 | -   | -                                                                                                                                                                                               |
| pC54_002       | CP042366  | <i>A. pittii</i>         | Australia       | 2014  | human clinical                   | 76,008  | 1 | -   | -                                                                                                                                                                                               |
| p1_100020      | CP027251  | <i>A. pittii</i>         | China; Chengdu  | 2015  | human                            | 77,340  | 1 | -   | -                                                                                                                                                                                               |
| p1_100004      | CP027247  | <i>A. pittii</i>         | China; Chengdu  | 2015  | human                            | 66,765  | 1 | -   | -                                                                                                                                                                                               |
| pAP43-2        | CP043054  | <i>A. pittii</i>         | China; Hangzhou | 2018  | human urine                      | 92,276  | 1 | -   | -                                                                                                                                                                                               |
| unnamed3       | CP069540  | <i>A. pittii</i>         | Germany         | ≤1994 | human urine                      | 94,387  | 1 | -   | -                                                                                                                                                                                               |
| unnamed2       | CP069506  | <i>A. pittii</i>         | unknown         | ≤1994 | human sputum                     | 94,379  | 1 | -   | -                                                                                                                                                                                               |
| pAS61-1        | CP061590  | <i>A. seifertii</i>      | China; Taiwan   | 2010  | human blood                      | 93,205  | 1 | -   | -                                                                                                                                                                                               |
| p2014N21-145-2 | CP033570  | <i>A. pittii</i>         | China; Taiwan   | 2014  | human                            | 72,034  | 1 | -   | -                                                                                                                                                                                               |
| p2014S07-126-2 | CP033532  | <i>A. pittii</i>         | China; Taiwan   | 2014  | human                            | 96,775  | 1 | -   | -                                                                                                                                                                                               |
| unnamed1       | CP077304  | <i>A. pittii</i>         | Germany         | ≤1994 | human ear discharge              | 94,386  | 1 | -   | -                                                                                                                                                                                               |
| p1_005069      | CP026087  | <i>A. pittii</i>         | China; Chengdu  | -     | human                            | 91,563  | 1 | -   | -                                                                                                                                                                                               |
| pDETAB5        | CP072528  | <i>A. baumannii</i>      | China; Hangzhou | 2019  | intensive care unit environment  | 97,035  | 2 | -   | <i>bla</i> <sub>NDM-1</sub> , <i>ble</i> <sub>MBL</sub> , <i>bla</i> <sub>OXA-58</sub> , <i>aacC2d</i> , <i>msr</i> (E)- <i>mph</i> (E), <i>sul2</i>                                            |
| pM131-2        | JX101647  | <i>A. soli</i>           | China; Taiwan   | 2010  | human sputum                     | 84,995  | 2 | -   | <i>bla</i> <sub>OXA-58</sub> , <i>aphA1</i> , <i>aacC2d</i> , <i>sul2</i> (x2)                                                                                                                  |
| p255n_1        | KT852971  | <i>A. baumannii</i>      | Vietnam         | 2005  | human nasal                      | 92,939  | 2 | -   | <i>bla</i> <sub>OXA-58</sub> , <i>aacC2d</i> , <i>bla</i> <sub>VEB</sub> , <i>arr-2</i> , <i>aadA1</i> , <i>aadB</i> , <i>cmlA6</i> , <i>msr</i> (E)- <i>mph</i> (E), <i>sul1</i> , <i>sul2</i> |
| pNDM1_010045   | CP028560  | <i>Acinetobacter</i> sp. | China; Chengdu  | 2015  | sewage                           | 190,170 | 2 | 34  | <i>bla</i> <sub>NDM-1</sub> , <i>ble</i> <sub>MBL</sub> , <i>bla</i> <sub>OXA-58</sub> (x2), <i>aacC2d</i> , <i>floR</i> , <i>msr</i> (E)- <i>mph</i> (E), <i>sul2</i> , <i>merA-2</i>          |
| pOXA58_005078  | CP027245  | <i>A. baumannii</i>      | China; Chengdu  | -     | human                            | 70,509  | 2 | -   | <i>bla</i> <sub>OXA-58</sub> , <i>aacC2d</i> , <i>floR</i> , <i>msr</i> (E)- <i>mph</i> (E)                                                                                                     |
| pBspH2         | CP055284  | <i>Acinetobacter</i> sp. | USA             | 1986  | soil                             | 161,809 | 3 | -   | -                                                                                                                                                                                               |
| unnamed3       | CP068198  | <i>A. johnsonii</i>      | The Netherlands | 2008  | spacecraft-associated clean room | 206,659 | 3 | -   | -                                                                                                                                                                                               |
| plas1          | CP070867  | <i>A. johnsonii</i>      | China; Shanghai | 2018  | bigeye tuna                      | 149,408 | 3 | -   | -                                                                                                                                                                                               |
| pAJ_082-3      | CP079794  | <i>A. johnsonii</i>      | Pakistan        | 2016  | intensive care unit sink         | 155,957 | 3 | -   | -                                                                                                                                                                                               |
| unnamed1       | CP033769  | <i>A. baumannii</i>      | USA             | 2016  | human sputum                     | 97,783  | - | -   | -                                                                                                                                                                                               |
| pTS134338      | CP042210  | <i>A. baumannii</i>      | India           | 2005  | soil                             | 134,338 | - | -   | -                                                                                                                                                                                               |
| pOCUAc17-1     | AP024799  | <i>A. pittii</i>         | Japan*          | ≤2021 | human blood*                     | 69,156  | - | -   | -                                                                                                                                                                                               |
| unnamed1       | CP077233  | <i>A. pittii</i>         | Germany         | ≤1990 | human wound swab                 | 69,574  | - | -   | -                                                                                                                                                                                               |
| pEC_gr13       | CP038263  | <i>A. baumannii</i>      | Czech Republic  | 2018  | frozen turkey liver              | 128,013 | - | -   | -                                                                                                                                                                                               |
| pE47_002       | CP042558  | <i>A. baumannii</i>      | Australia       | 2013  | hospital environment             | 59,744  | - | -   | -                                                                                                                                                                                               |
| pDETAB13       | CP073061  | <i>A. baumannii</i>      | China; Hangzhou | 2019  | human rectal                     | 91,083  | - | -   | -                                                                                                                                                                                               |
| pXBB1-8        | CP010358  | <i>A. johnsonii</i>      | China; Chengdu* | -     | sewage*                          | 117,483 | - | -   | -                                                                                                                                                                                               |
| pCUVET596      | CP041149  | <i>A. baumannii</i>      | Thailand        | 2017  | dog urine                        | 82,016  | - | -   | -                                                                                                                                                                                               |
| p2012C01-137-2 | CP033559  | <i>A. nosocomialis</i>   | China; Taiwan   | 2012  | human                            | 72,978  | - | -   | -                                                                                                                                                                                               |
| unnamed1       | CP068175  | <i>A. ursingii</i>       | The Netherlands | 2003  | spacecraft-associated clean room | 120,510 | - | -   | -                                                                                                                                                                                               |
| pAR3           | CP038025  | <i>A. radioresistans</i> | Chile           | 2008  | soil                             | 80,103  | - | -   | -                                                                                                                                                                                               |
| p2014S06-099-1 | CP033541  | <i>A. pittii</i>         | China; Taiwan   | 2014  | human                            | 125,715 | - | -   | -                                                                                                                                                                                               |
| pIC001A        | CP022299  | <i>A. johnsonii</i>      | Japan           | 2003  | Tokyo Bay water                  | 94,476  | - | 26  | -                                                                                                                                                                                               |
| pCAM180A       | CP044357  | <i>A. baumannii</i>      | Cambodia        | 2016  | human oral                       | 92,034  | - | -   | -                                                                                                                                                                                               |
| p2010S01-197-2 | CP033563  | <i>A. nosocomialis</i>   | China; Taiwan   | 2010  | human                            | 92,044  | - | -   | <i>bla</i> <sub>OXA-58</sub> (x2), <i>aacC2d</i> , <i>sul2</i>                                                                                                                                  |
| unnamed2       | CP069498  | <i>A. pittii</i>         | Germany         | ≤1994 | human blood                      | 128,321 | - | 24  | -                                                                                                                                                                                               |
| pEH_Gr13       | CP038259  | <i>A. baumannii</i>      | Czech Republic  | 2018  | human tracheal                   | 135,229 | - | -   | -                                                                                                                                                                                               |

\* = uncertain, information derived from submitter information and expected publication titles included in GenBank entries

L = lineage defined here, plasmids assigned to lineages 1, 2 or 3 are shaded pink, blue or orange, respectively

+GR = plasmids contain an additional replicon of GR type #

**Table S6:** Characteristics of *dif* modules examined in this study

| module           | size<br>(bp) | putative function or content                       | reference<br>plasmid |
|------------------|--------------|----------------------------------------------------|----------------------|
| <i>oxa58</i>     | 2,257        | carbapenem resistance                              | pDETAB5              |
| <i>sul2</i>      | 5,051        | sulphonamide resistance                            | pDETAB5              |
| <i>msrE-mphE</i> | 2,950        | macrolide resistance                               | pDETAB5              |
| <i>aacC2d</i>    | 9,468        | aminoglycoside resistance                          | pDETAB5              |
| <i>dif-696a</i>  | 696          | toxin-antitoxin                                    | pDETAB5              |
| <i>dif-696b</i>  | 696          | toxin-antitoxin                                    | pDETAB13             |
| <i>dif-823</i>   | 823          | toxin-antitoxin (AbkAB)                            | pDETAB5              |
| <i>dif-701</i>   | 701          | toxin-antitoxin (HigAB)                            | pDETAB5              |
| <i>dif-1491</i>  | 1,491        | toxin-antitoxin + unknown ORFs                     | pDETAB13             |
| <i>dif-2111</i>  | 2,111        | alcohol tolerance                                  | pDETAB13             |
| <i>dif-6874</i>  | 6,874        | alcohol tolerance                                  | AP024799             |
| <i>dif-7136</i>  | 7,136        | alcohol tolerance                                  | CU459140             |
| <i>dif-28327</i> | 28,327       | copper resistance                                  | CP068175             |
| <i>dif-RND</i>   | 9,903        | RND efflux                                         | pDETAB5              |
| <i>dif-7932</i>  | 7,932        | metabolism; possibly aromatic compound degradation | CP022299             |
| <i>dif-1769</i>  | 1,769        | sulphate permease                                  | CP022299             |
| <i>dif-6620</i>  | 6,620        | small plasmid + mobilisation determinant           | CP022299             |
| <i>dif-801</i>   | 801          | VRR-NUC domain protein                             | CP022299             |
| <i>dif-614</i>   | 614          | unknown                                            | pDETAB5              |
| <i>dif-1209</i>  | 1,209        | unknown                                            | pDETAB5              |
| <i>dif-1612</i>  | 1,612        | unknown                                            | pDETAB13             |
